# Supplementary material for: Predictors of Mortality in Patients with Infections Due to Carbapenem-Resistant Gram-Negative Bacteria
Source: MDPI journal article supplement (doi:10.3390/antibiotics12071130), 2023-06-29
Supplement: s1 [file s1]

## Supplementary material

### Predictors of Mortality in Patients with Infections due to Carbapenem-Resistant Gram-Negative

#### Bacteria

**Table S1.** Risk factors for the acquisition of CR-GNB and mortality

| <b>Variable</b>                                       | <b>Total<br/>n=225 (100%)</b> | <b>Death at 90<br/>days<br/>(33.8%)</b> | <b>Survivors<br/>during first 90<br/>days<br/>n=149 (66.2%)</b> | <b><i>p</i></b> |
|-------------------------------------------------------|-------------------------------|-----------------------------------------|-----------------------------------------------------------------|-----------------|
| Chemotherapy in last 180 days, n (%)                  | 48 (21.4)                     | 26 (34.2)                               | 22 (14.9)                                                       | 0.001           |
| Antibiotic use in last 180 days, n (%)                | 204 (9.7)                     | 60 (90.8)                               | 135 (90.6)                                                      | 0.964           |
| Health care utilization in last 180 days, n (%)       | 140 (62.2)                    | 44 (57.9)                               | 96 (64.4)                                                       | 0.339           |
| Resistant-bacterial infection in last 180 days, n (%) | 62 (27.6)                     | 16 (21.1)                               | 46 (30.9)                                                       | 0.119           |
| Surgery in last 180 days, n (%)                       | 74 (33.0)                     | 19 (25.0)                               | 55 (37.2)                                                       | 0.067           |
| ICU in last 180 days, n (%)                           | 94 (42.0)                     | 29 (38.2)                               | 65 (43.9)                                                       | 0.408           |
| Intravascular devices use in last 180 days, n (%)     | 173 (76.9)                    | 59 (77.6)                               | 114 (76.5)                                                      | 0.850           |
| Antibiotic use at diagnosis, n (%)                    | 195 (86.7)                    | 69 (90.8)                               | 126 (84.6)                                                      | 0.194           |

ICU: intensive care unit.

**Table S2.** Laboratory values at the time of diagnosis of CR-GNB infection

| <b>Laboratorios</b>                                      | <b>Total<br/>n=225 (100%)</b> | <b>Death at 90<br/>days<br/>(33.8%)</b> | <b>Survivors at 90<br/>days<br/>n=149 (66.2%)</b> | <b><i>p</i></b> |
|----------------------------------------------------------|-------------------------------|-----------------------------------------|---------------------------------------------------|-----------------|
| Hemoglobin - g/dL, median (IQR)                          | 9.1 (7.8-10.5)                | 8.4 (7.2-9.8)                           | 9.5 (8.1-11.0)                                    | 0.0001          |
| Leukocytes - x10 <sup>3</sup> /μL, median (IQR)          | 9.1 (5.5 – 12.7)              | 10.8 (3.8-15.9)                         | 8.5 (5.8-11.0)                                    | 0.0588          |
| Total neutrophils - x10 <sup>3</sup> /μL, median (IQR)   | 6.4 (2.3-9.9)                 | 8.1 (1.7-11.8)                          | 6.0 (2.8-8.7)                                     | 0.0963          |
| Total lymphocytes - x10 <sup>3</sup> /μL, median (IQR)   | 0.6 (0.2-1.1)                 | 0.4 (0.1-0.9)                           | 0.7 (0.3-1.2)                                     | 0.0077          |
| Platelets - x10 <sup>3</sup> /μL, median (IQR)           | 221 (107-357)                 | 149 (27-276)                            | 278 (182-378)                                     | <0.0001         |
| Glucose - mg/dL, median (IQR)                            | 116 (97-147)                  | 136 (115-158)                           | 108 (94-136)                                      | 0.0001          |
| Creatinine - mg/dL, median (IQR)<br>n=204 (RRT excluded) | 0.56 (0.41-0.93)              | 0.63 (0.42-1.15)<br>n=65                | 0.54 (0.40-0.81)<br>n=139                         | 0.1289          |
| Albumin - g/L, median (IQR)<br>n=218                     | 2.54 (2.19-2.98)              | 2.36 (1.93-2.79)<br>n=76                | 2.68 (2.32-3.04)<br>n=142                         | 0.0003          |
| Total bilirubin - mg/dL, median (IQR)<br>n=218           | 0.8 (0.5-1.8)                 | 0.8 (0.5-2.5)<br>n=76                   | 0.7 (0.4-1.7)<br>n=142                            | 0.5178          |
| C reactive protein mg/dL, median (IQR)<br>n=209          | 13.6 (6.7-19.6)               | 16.0 (10.5-22.7)<br>n=69                | 12.4 (5.2-17.8)<br>n=140                          | 0.0016          |

**dL:** deciliters, **g:** grams, **L:** liters, **mg:** milligrams, **IQR:** interquartile range, **RRT:** renal replacement therapy, **μL:** microliters

**Table S3.** Microbiological isolates and mortality

| <b>Microbiological isolate</b> | <b>Total<br/>n=225<br/>(100%)</b> | <b>Death at 90<br/>days<br/>(33.8%)</b> | <b>Survivors<br/>at 90 days<br/>(66.2%)</b> | <b><i>p</i></b> |
|--------------------------------|-----------------------------------|-----------------------------------------|---------------------------------------------|-----------------|
| Enterobacterales               | 122 (54.2)                        | 41 (54.0)                               | 81 (54.4)                                   | 0.953           |

|                                      |                   |                  |                  |
|--------------------------------------|-------------------|------------------|------------------|
| - <i>Escherichia coli</i>            | 68/122            | 22/41            | 46/81            |
| - <i>Klebsiella pneumoniae</i>       | 21/122            | 7/41             | 14/81            |
| - <i>Complejo Enterobacter</i>       | 15/122            | 5/41             | 10/81            |
| - <i>Raoultella sp</i>               | 8/122             | 3/41             | 5/81             |
| - <i>Klebsiella aerogenes</i>        | 5/122             | 0/41             | 5/81             |
| - <i>Citrobacter freundii</i>        | 3/122             | 2/41             | 1/81             |
| - <i>Klebsiella oxytoca</i>          | 1/122             | 1/41             | 0/81             |
| - <i>Serratia marcescens</i>         | 1/122             | 1/41             | 0/81             |
| Non-fermenting Gram-negative bacilli | <b>103 (45.8)</b> | <b>35 (46.1)</b> | <b>68 (45.6)</b> |
| - <i>Pseudomonas aeruginosa</i>      | 95/103            | 30/35            | 65/68            |
| - <i>Acinetobacter baumannii</i>     | 6/103             | 5/35             | 1/68             |
| - <i>Pseudomonas sp</i>              | 2/103             | 0/35             | 2/68             |

sp: species

**Table S4.** Microbiological isolates and types of infection

| Microbiological isolate              | Bloodstream infection<br>n=19 (%) | Respiratory tract infection<br>n=88 (%) | Intraabdominal infection<br>n=85 (%) | Urinary tract infection<br>n=28 (%) | Bone and soft tissue infection<br>n=18 (%) | Other infection<br>n=4 (%) |
|--------------------------------------|-----------------------------------|-----------------------------------------|--------------------------------------|-------------------------------------|--------------------------------------------|----------------------------|
| Enterobacterales                     | 14 (73.7)                         | 36 (40.9)                               | 50 (58.2)                            | 16 (54.1)                           | 12 (66.7)                                  | 2 (50)                     |
| - <i>E. coli</i>                     | 10/19                             | 14/88                                   | 37/85                                | 8/28                                | 6/18                                       | 1/4                        |
| - <i>K. pneumoniae</i>               | 1/19                              | 4/88                                    | 6/85                                 | 3/28                                | 6/18                                       | 1/4                        |
| - <i>C. Enterobacter</i>             | 3/19                              | 8/88                                    | 3/85                                 | 1/28                                | 0/18                                       | 0                          |
| - <i>Raoultella sp</i>               | 0/19                              | 3/88                                    | 2/85                                 | 3/28                                | 0/18                                       | 0                          |
| - <i>K. aerogenes</i>                | 0/19                              | 4/88                                    | 0/85                                 | 1/28                                | 0/18                                       | 0                          |
| - <i>C. freundii</i>                 | 0/19                              | 2/88                                    | 1/85                                 | 0/28                                | 0/18                                       | 0                          |
| - <i>K. oxytoca</i>                  | 0/19                              | 1/88                                    | 0/85                                 | 0/28                                | 0/18                                       | 0                          |
| - <i>S. marcescens</i>               | 0/16                              | 0/88                                    | 1/85                                 | 0/28                                | 0/18                                       | 0                          |
| Non-fermenting Gram-negative bacilli | 5 (26.3)                          | 52 (59.1)                               | 35 (41.2)                            | 12 (42.9)                           | 6 (33.3)                                   | 2 (50)                     |
| - <i>Pseudomonas aeruginosa</i>      | 5/19                              | 46/88                                   | 34/85                                | 11/28                               | 6/18                                       | 2/4                        |
| - <i>Acinetobacter baumannii</i>     | 0/19                              | 5/88                                    | 0/85                                 | 1/28                                | 0/18                                       | 0/4                        |
| - <i>Pseudomonas sp</i>              | 0/19                              | 1/88                                    | 1/85                                 | 0/28                                | 0/18                                       | 0/4                        |

**Table S5.** Microbiological isolates and non-susceptibility frequency.

| Microbiological isolate                     | TZP   | C3G*  | AK    | CIP   | TIGE | COL  | ETP   | IMP   | MEM   |
|---------------------------------------------|-------|-------|-------|-------|------|------|-------|-------|-------|
| <b>Enterobacterales</b>                     |       |       |       |       |      |      |       |       |       |
| <i>E. coli</i>                              | 56/59 | 60/66 | 3/66  | 61/66 | 1/59 | 0/58 | 66/67 | 46/67 | 51/68 |
| <i>K. pneumoniae</i>                        | 19/19 | 20/21 | 3/21  | 19/21 | 0/14 | 0/19 | 18/21 | 17/21 | 12/21 |
| <i>C. Enterobacter</i>                      | 6/13  | 8/15  | 0/15  | 3/15  | 0/12 | 0/10 | 7/15  | 6/15  | 0/15  |
| <i>Raoultella sp</i>                        | 6/6   | 1/8   | 0/8   | 7/8   | 0/6  | 0/6  | 5/7   | 6/7   | 2/8   |
| <i>K. aerogenes</i>                         | 2/5   | 2/5   | 0/5   | 1/5   | 1/5  | 0/2  | 2/5   | 3/5   | 0/5   |
| <i>C. freundii</i>                          | 3/3   | 2/3   | 0/3   | 2/3   | 0/3  | 0/2  | 3/3   | 2/3   | 0/3   |
| <i>K. oxytoca</i>                           | 1/1   | 0/1   | 0/1   | 1/1   | 0/1  | 0/1  | 1/1   | 0/1   | 1/1   |
| <i>S. marcescens</i>                        | 0/1   | 0/1   | 0/1   | 0/1   | 0/1  |      | 1/1   |       | 0/1   |
| <b>Non-fermenting Gram-negative bacilli</b> |       |       |       |       |      |      |       |       |       |
| <i>Pseudomonas aeruginosa</i>               | 39/86 | 35/93 | 20/93 | 32/91 |      | 4/81 |       | 88/91 | 88/94 |
| <i>Acinetobacter baumannii</i>              | 5/6   | 5/6   | 5/6   | 5/6   | 2/6  | 0/3  |       | 4/6   | 4/6   |
| <i>Pseudomonas sp</i>                       | 1/2   | 1/2   | 0/1   | 1/1   |      | 0/2  |       | 2/2   | 2/2   |

**AK:** amikacin, **C3G:** third generation cephalosporins, **CIP:** ciprofloxacin, **COL:** colistin, **ETP:** ertapenem, **IMP:** imipenem, **MEM:** meropenem. **Sp:** species, **TIGE:** tigecycline, **TZP:** piperacillin/tazobactam,

\*Ceftriaxone in the case of Enterobacterales and Ceftazidime in the case of non-fermenting Gram-negative bacilli.

**Table S6.** Microbiological isolates and presence of carbapenemases.

| Microbiological isolate                     | mCIM<br>n=126 | eCIM<br>n=79 | OXA-48<br>N=88 | KPC<br>N=88 | NDM<br>N=88 | GES<br>N=88 |
|---------------------------------------------|---------------|--------------|----------------|-------------|-------------|-------------|
| <b>Enterobacterales</b>                     |               |              |                |             |             |             |
| <i>E. coli</i>                              | 48/63         | 33/48        | 11/52          | 1/52        | 20/52       | 3/52        |
| <i>K. pneumoniae</i>                        | 18/20         | 4/18         | 6/11           | 2/11        | 3/11        | 4/11        |
| <i>C. Enterobacter</i>                      | 4/13          | 0/4          | 1/6            | 1/6         | 3/6         | 0/6         |
| <i>Raoultella sp</i>                        | 7/7           | 0/7          | 4/4            | 0/4         | 0/4         | 1/4         |
| <i>K. aerogenes</i>                         | 1 / 2         | 0/1          | 0/1            | 0/1         | 0/1         | 0/1         |
| <i>C. freundii</i>                          | 1/1           | 0/1          | 0/0            | 0/0         | 0/0         | 0/0         |
| <i>K. oxytoca</i>                           | 0/0           |              | 1/1            | 0/1         | 0/1         | 0/1         |
| <i>S. marcescens</i>                        | 0/1           |              | 0/0            | 0/0         | 0/0         | 0/0         |
| <b>Non-fermenting Gram-negative bacilli</b> |               |              |                |             |             |             |
| <i>Pseudomonas aeruginosa</i>               |               |              | 0/13           | 0/13        | 0/13        | 4/13        |
| <b>Total</b>                                | 79            | 37           | 23             | 4           | 26          | 12          |

**eCIM:** EDTA-modified carbapenem inactivation method, **GES:** “Guiana extended spectrum” type enzyme, **KPC:** *Klebsiella pneumoniae* carbapenemase, **mCIM:** carbapenem inactivation method, **NDM:** New Dheli Metallo-beta-lactamase, **OXA-48:** oxacillinase 48.

**Table S7.** Appropriate treatment and mortality at 90 days.

| Appropriate treatment | Total<br>n=225 (100%) | Death at 90 days<br>n=76 (33.8%) | Survivors at 90 days<br>n=149 (66.2%) | <i>p</i> |
|-----------------------|-----------------------|----------------------------------|---------------------------------------|----------|
| Yes, n (%)            | 196 (87.1)            | 57 (75.0)                        | 139 (93.3)                            | <0.0001  |
| No, n (%)             | 29 (12.9)             | 19 (25.0)                        | 10 (6.7)                              |          |

**Table S8.** Type of appropriate antibiotic treatment received.

| Appropriate treatment         | Total=196 |
|-------------------------------|-----------|
| Carbapenem                    | 44/196    |
| Aminoglycoside                | 55/196    |
| Piperacillin/tazobactam       | 31/196    |
| Tigecycline                   | 35/196    |
| Trimethoprim/sulfamethoxazole | 1/196     |
| Ceftazidime                   | 29/196    |
| Ceftazidima/avibactam         | 8/196     |
| Ceftolozane/tazobactam        | 1/196     |
| Quinolones                    | 5/196     |
| Fosfomycin                    | 9/196     |
| Colistin                      | 35/196    |

**Table S9.** Treatment duration by type of infection.

|                                         | Total<br>n=225 (100%) | Death at 90 days<br>n=76 (33.8%) | Survivors at 90 days<br>n=149 (66.2%) | <i>p</i> |
|-----------------------------------------|-----------------------|----------------------------------|---------------------------------------|----------|
| Treatment duration - days, median (IQR) | 10 (7-15)             | 8 (1-12)                         | 10 (7-15)                             | 0.0031   |
| <i>Bloodstream infections</i>           | 10 (7-17)             | 15 (0-23)                        | 10 (8-15)                             | 0.6468   |
| <i>Respiratory tract infections</i>     | 8 (5-13)              | 7 (0-10)                         | 10 (7-14)                             | 0.0009   |
| <i>Intraabdominal infections</i>        | 10 (7-21)             | 8 (5-14)                         | 11 (7-24)                             | 0.1643   |

|                                        |                  |                   |                  |               |
|----------------------------------------|------------------|-------------------|------------------|---------------|
| <i>Urinary tract infections</i>        | <i>10 (6-13)</i> | <i>10 (10-11)</i> | <i>9 (6-14)</i>  | <i>0.5258</i> |
| <i>Bone and soft tissue infections</i> | <i>11 (7-38)</i> | <i>11 (6-38)</i>  | <i>13 (8-41)</i> | <i>0.8239</i> |
| <i>Others</i>                          | <i>7 (4-11)</i>  | <i>-</i>          | <i>7 (4-11)</i>  | <i>-</i>      |

**IQR:** interquartile range

**Table S10.** Bivariate analysis for primary outcome.

| Variable | HR (CI 95%), <i>p</i> |
|----------|-----------------------|
|----------|-----------------------|

|                                                  |                           |
|--------------------------------------------------|---------------------------|
| Male gender                                      | 1.37 (0.84-2.23), 0.206   |
| Age                                              | 1.02 (1.00-1.03), 0.01    |
| <b>CR-GNB infection</b>                          |                           |
| - Bloodstream infection                          | 1.35 (0.65-2.81), 0.423   |
| - Respiratory tract infection                    | 1.93 (1.23-3.03), 0.004   |
| - Intraabdominal infection                       | 0.36 (0.21-0.63), <0.001  |
| - Urinary tract infection                        | 0.43 (0.17-1.07), 0.69    |
| - Bone and soft tissue infection                 | 2.17 (1.11-4.23), 0.022   |
| <b>Comorbidity</b>                               |                           |
| - Charlson index >3                              | 2.08 (2.33-3.27), 0.001   |
| - COVID-19                                       | 0.86 (0.50-1.48), 0.595   |
| - Obesity                                        | 0.86 (0.49-1.50), 0.592   |
| - Diabetes                                       | 1.16 (0.68-1.94), 0.563   |
| - Heart disease                                  | 1.88 (1.14-3.08), 0.013   |
| - Hypertension                                   | 1.21 (0.76-1.93), 0.413   |
| - COPD                                           | 1.91 (0.60-6.07), 0.271   |
| - Immunosuppression                              | 1.86 (1.18-2.92), 0.007   |
| - Iatrogenic bile duct injury                    | 0.51 (0.24-1.12), 0.095   |
| - Liver cirrhosis                                | 2.58 (0.81-8.20), 0.108   |
| - Renal replacement therapy                      | 1.95 (1.03-3.70), 0.040   |
| - Cerebrovascular disease                        | 1.83 (0.67-5.01), 0.241   |
| - Urological disorders                           | 0.42 (0.15-1.15), 0.092   |
| - Tracheostomy carriers                          | 0.80 (0.40-1.60), 0.535   |
| - Mechanical ventilation at diagnosis            | 1.78 (1.12-2.83), 0.015   |
| - Septic shock at the time of diagnosis          | 2.75 (1.75-4.33), <0.0001 |
| - Bacterial coinfection                          | 0.99 (0.63-1.56), 0.979   |
| - Secondary bacteremia                           | 0.84 (0.49-1.42), 0.150   |
| <b>Risk factor for CR-GNB infections</b>         |                           |
| - Chemotherapy in last 180 days                  | 2.12 (1.32-3.40), 0.002   |
| - Antibiotic use in last 180 days                | 0.96 (0.44-2.09), 0.918   |
| - Health care utilization in last 180 days       | 0.78 (0.49-1.22), 0.285   |
| - Resistant-bacterial infection in last 180 days | 0.62 (0.36-1.08), 0.092   |
| - Surgery in last 180 days                       | 0.60 (0.36-1.01), 0.052   |
| - ICU in last 180 days                           | 0.84 (0.53-1.33), 0.455   |
| - Intravascular devices use in last 180 days     | 0.99 (0.58-1.70), 0.972   |
| - Antibiotic use at diagnosis                    | 1.66 (0.76-3.62), 0.200   |
| <b>Patient location at diagnosis</b>             |                           |
| ICU                                              | 2.08 (1.32-3.26), 0.001   |
| <b>Laboratorios, mediana</b>                     |                           |
| - Hemoglobin <10 g/dl                            | 2.56 (1.46-4.51), 0.001   |

|                                                                            |                           |
|----------------------------------------------------------------------------|---------------------------|
| - Leukocytes <3,900 x10 <sup>3</sup> /μL                                   | 1.76 (1.06-2.93), 0.030   |
| - Total neutrophils <1,500 x10 <sup>3</sup> /μL                            | 0.9 (0.50-1.7), 0.779     |
| - Total lymphocytes <800 x10 <sup>3</sup> /μL                              | 1.52 (0.94-2.45), 0.087   |
| - Platelets <150,000 x10 <sup>3</sup> /μL                                  | 2.95 (1.88-4.64), <0.0001 |
| - Glucose >200 mg/dl                                                       | 2.31 (1.06-5.03), 0.036   |
| - Creatinine >1.2 mg/dl<br>n=204 (excluído TSR)                            | 1.81 (1.03-4.19), 0.039   |
| - Albumin <3.5 mg/dl<br>n=218                                              | 2.52 (1.58-4.02), <0.001  |
| - Total bilirrubin >1.2 mg/dl<br>n=218                                     | 1.17 (0.74-1.85) 0.504    |
| - C reactive protein >10 mg/dl<br>n=209                                    | 2.20 (1.27-3.80), 0.005   |
| Non-fermenting Gram-negative bacilli                                       | 1.05 (0.67-1.65), 0.832   |
| Appropriate treatment                                                      | 0.26 (0.15-0.44), <0.0001 |
| Acute kidney injury within the first 10 days of treatment                  | 2.37 (1.43-3.91), 0.001   |
| Mechanical ventilation at diagnosis                                        | 2.90 (1.60-5.28), <0.0001 |
| ICU stay after diagnosis                                                   | 2.57 (1.48-4.47), 0.001   |
| Carbapenemase-carrier Enterobacterales (mCIM positive)<br>n=107            | 1.12 (0.54-2.32), 0.756   |
| Metallo-β-lactamase vs serine-carbapenemase in<br>Enterobacterales<br>n=72 | 1.20 (0.53-2.73), 0.440   |

**CI:** confidence interval, **CR-GNB:** carbapenem-resistant Gram-negative bacilli, **COPD:** chronic obstructive pulmonary disease, **CVD:** cerebrovascular disease, **HR:** hazard ratio, **mCIM:** carbapenem inactivation method, **ICU:** intensive care unit.



### **Considerations for the multivariate analysis model construction**

Charlson was not included in the model since this variable includes age and comorbidities. COVID-19 was not included in the model due to interactions with obesity, diabetes, and upper respiratory tract infection. COPD was not included due to its interaction with heart disease. Iatrogenic bile duct injury interacted with abdominal sepsis was not included. Stroke interacted with diabetes mellitus was not included. Urological alterations or tracheostomy carriers interacted with urinary and respiratory infection, respectively, and were not included. Bacterial co-infection was not included at the investigators' discretion as failure of appropriate treatment is not expected. Secondary bacteremia was excluded because it was exclusive to primary bloodstream infections. Risk factors for acquiring BGNRC infections (e.g., prior chemotherapy, etc.) interacted with comorbidities (eg immunosuppression) and were not included. Laboratory parameters were not included as it is impossible to account for the variability of results over time and interactions with comorbidities. According to the prespecified analysis plan, secondary outcomes were not included

in the predictive model of the primary outcome. Carbapenemase phenotype and genotype were not included, as testing was not performed on the entire cohort
